# Supplementary material for: Balasubramide derivative 3C attenuates atherosclerosis in apolipoprotein E-deficient mice: role of AMPK-STAT1-STING signaling pathway
Source: publisher site journal article supplement (doi:10.18632/aging.202929), 2021-04-26
Supplement: Supplementary file [file aging-v13i8-202929-supplementary-material-SD1.pdf]

## SUPPLEMENTARY FIGURE

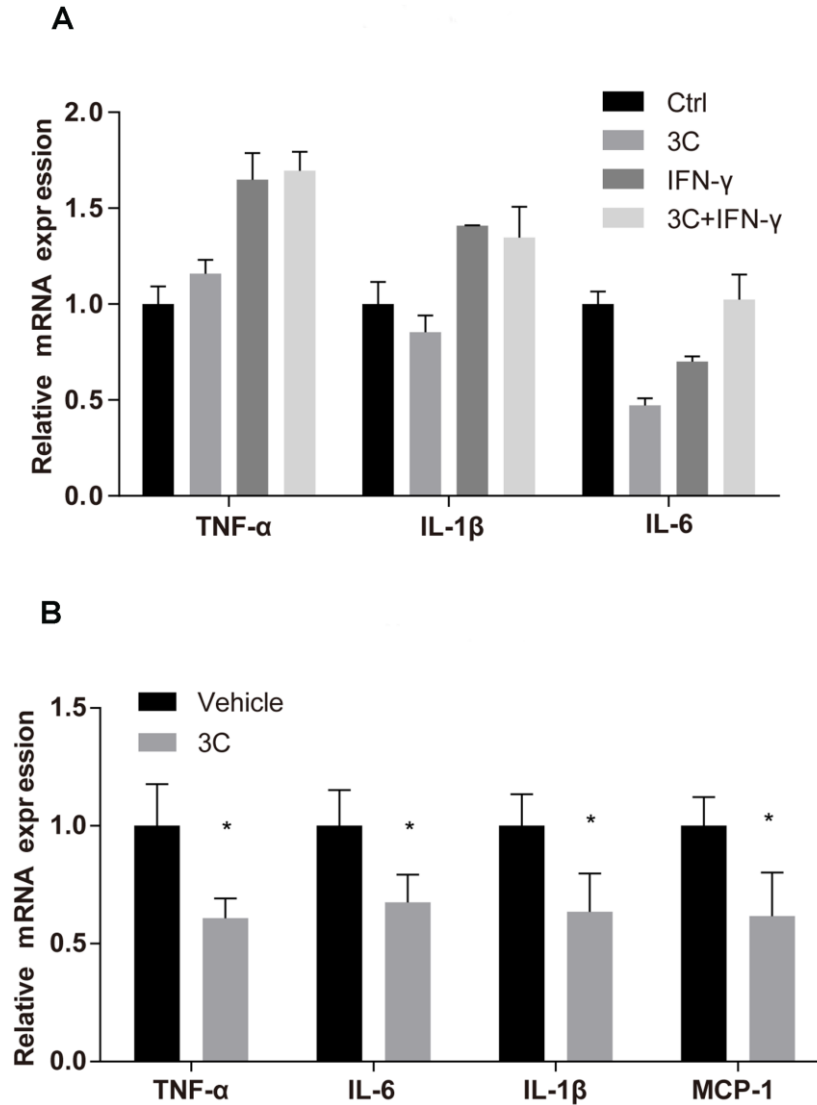

**Supplementary Figure 1.** (A) Relative gene expression of TNF- $\alpha$ , IL- $\beta$ , IL-6 normalized to  $\beta$ -Actin. The experiments were performed in triplicate and repeated at least three times on different days. (B) Fold change of TNF- $\alpha$ , IL- $\beta$ , IL-6 and MCP-1 mRNA expression level from aortas of different groups (n=4). Results are expressed as means  $\pm$  SEM. \* $P$ <0.05, \*\* $P$ <0.01.
